# Supplementary material
Source: publisher site journal article supplement (https://www.spandidos-publications.com/7581/downloadSupplementary)
Supplement: Supplementary file 1 [file downloadSupplementary]

## Sheet: Table SXIII
Table SXIII. Clusters of septic samples in the training cohort (GSE185263).
Sample	Cluster
GSM5608946	A
GSM5608947	A
GSM5608948	A
GSM5608949	A
GSM5608950	A
GSM5608952	A
GSM5608953	A
GSM5608954	A
GSM5608955	A
GSM5608956	A
GSM5608958	A
GSM5608959	A
GSM5608960	A
GSM5608961	A
GSM5608965	A
GSM5608966	A
GSM5608969	A
GSM5608973	A
GSM5608978	A
GSM5608982	A
GSM5608986	A
GSM5608987	A
GSM5608988	A
GSM5608990	A
GSM5608991	A
GSM5608992	A
GSM5608993	A
GSM5608996	A
GSM5608999	A
GSM5609006	A
GSM5609008	A
GSM5609009	A
GSM5609010	A
GSM5609012	A
GSM5609015	A
GSM5609016	A
GSM5609017	A
GSM5609019	A
GSM5609020	A
GSM5609022	A
GSM5609026	A
GSM5609036	A
GSM5609038	A
GSM5609040	A
GSM5609041	A
GSM5609042	A
GSM5609043	A
GSM5609045	A
GSM5609046	A
GSM5609050	A
GSM5609053	A
GSM5609054	A
GSM5609055	A
GSM5609057	A
GSM5609058	A
GSM5609061	A
GSM5609062	A
GSM5609068	A
GSM5609069	A
GSM5609070	A
GSM5609071	A
GSM5609073	A
GSM5609074	A
GSM5609075	A
GSM5609077	A
GSM5609078	A
GSM5609079	A
GSM5609081	A
GSM5609083	A
GSM5609085	A
GSM5609086	A
GSM5609087	A
GSM5609089	A
GSM5609094	A
GSM5609103	A
GSM5609109	A
GSM5609112	A
GSM5609114	A
GSM5609115	A
GSM5609118	A
GSM5609131	A
GSM5609133	A
GSM5609136	A
GSM5609142	A
GSM5609143	A
GSM5609144	A
GSM5609150	A
GSM5609158	A
GSM5609160	A
GSM5609161	A
GSM5609162	A
GSM5609166	A
GSM5609167	A
GSM5609168	A
GSM5609170	A
GSM5609171	A
GSM5609175	A
GSM5609176	A
GSM5609178	A
GSM5609179	A
GSM5609183	A
GSM5609184	A
GSM5609185	A
GSM5609186	A
GSM5609187	A
GSM5609190	A
GSM5609192	A
GSM5609193	A
GSM5609195	A
GSM5609196	A
GSM5609198	A
GSM5609199	A
GSM5609200	A
GSM5609201	A
GSM5609203	A
GSM5609206	A
GSM5609207	A
GSM5609208	A
GSM5609210	A
GSM5609211	A
GSM5609251	A
GSM5609253	A
GSM5609254	A
GSM5609256	A
GSM5609257	A
GSM5609259	A
GSM5609260	A
GSM5609262	A
GSM5609264	A
GSM5609265	A
GSM5609267	A
GSM5609269	A
GSM5609270	A
GSM5609271	A
GSM5609272	A
GSM5609273	A
GSM5609276	A
GSM5609277	A
GSM5609282	A
GSM5609283	A
GSM5609285	A
GSM5609286	A
GSM5609287	A
GSM5609292	A
GSM5609293	A
GSM5609296	A
GSM5609298	A
GSM5609299	A
GSM5609300	A
GSM5609303	A
GSM5609304	A
GSM5609306	A
GSM5609307	A
GSM5609308	A
GSM5609310	A
GSM5609312	A
GSM5609315	A
GSM5609317	A
GSM5609320	A
GSM5609322	A
GSM5609324	A
GSM5609326	A
GSM5609327	A
GSM5609328	A
GSM5609329	A
GSM5609330	A
GSM5609331	A
GSM5608951	B
GSM5608957	B
GSM5608962	B
GSM5608963	B
GSM5608964	B
GSM5608967	B
GSM5608968	B
GSM5608970	B
GSM5608971	B
GSM5608972	B
GSM5608974	B
GSM5608975	B
GSM5608976	B
GSM5608977	B
GSM5608979	B
GSM5608980	B
GSM5608981	B
GSM5608983	B
GSM5608984	B
GSM5608985	B
GSM5608989	B
GSM5608994	B
GSM5608995	B
GSM5608997	B
GSM5608998	B
GSM5609000	B
GSM5609001	B
GSM5609002	B
GSM5609003	B
GSM5609004	B
GSM5609005	B
GSM5609007	B
GSM5609011	B
GSM5609013	B
GSM5609014	B
GSM5609018	B
GSM5609021	B
GSM5609023	B
GSM5609024	B
GSM5609025	B
GSM5609027	B
GSM5609028	B
GSM5609029	B
GSM5609030	B
GSM5609031	B
GSM5609032	B
GSM5609033	B
GSM5609034	B
GSM5609035	B
GSM5609037	B
GSM5609039	B
GSM5609044	B
GSM5609047	B
GSM5609048	B
GSM5609049	B
GSM5609051	B
GSM5609052	B
GSM5609056	B
GSM5609059	B
GSM5609060	B
GSM5609063	B
GSM5609064	B
GSM5609065	B
GSM5609066	B
GSM5609067	B
GSM5609072	B
GSM5609076	B
GSM5609080	B
GSM5609082	B
GSM5609084	B
GSM5609088	B
GSM5609090	B
GSM5609091	B
GSM5609092	B
GSM5609093	B
GSM5609095	B
GSM5609096	B
GSM5609097	B
GSM5609098	B
GSM5609099	B
GSM5609100	B
GSM5609101	B
GSM5609102	B
GSM5609104	B
GSM5609105	B
GSM5609106	B
GSM5609107	B
GSM5609108	B
GSM5609110	B
GSM5609111	B
GSM5609113	B
GSM5609116	B
GSM5609117	B
GSM5609119	B
GSM5609120	B
GSM5609121	B
GSM5609122	B
GSM5609123	B
GSM5609124	B
GSM5609125	B
GSM5609126	B
GSM5609127	B
GSM5609128	B
GSM5609129	B
GSM5609130	B
GSM5609132	B
GSM5609134	B
GSM5609135	B
GSM5609137	B
GSM5609138	B
GSM5609139	B
GSM5609140	B
GSM5609141	B
GSM5609145	B
GSM5609146	B
GSM5609147	B
GSM5609148	B
GSM5609149	B
GSM5609151	B
GSM5609152	B
GSM5609153	B
GSM5609154	B
GSM5609155	B
GSM5609156	B
GSM5609157	B
GSM5609159	B
GSM5609163	B
GSM5609164	B
GSM5609165	B
GSM5609169	B
GSM5609172	B
GSM5609173	B
GSM5609174	B
GSM5609177	B
GSM5609180	B
GSM5609181	B
GSM5609182	B
GSM5609188	B
GSM5609189	B
GSM5609191	B
GSM5609194	B
GSM5609197	B
GSM5609202	B
GSM5609204	B
GSM5609205	B
GSM5609209	B
GSM5609252	B
GSM5609255	B
GSM5609258	B
GSM5609261	B
GSM5609263	B
GSM5609266	B
GSM5609268	B
GSM5609274	B
GSM5609275	B
GSM5609278	B
GSM5609279	B
GSM5609280	B
GSM5609281	B
GSM5609284	B
GSM5609288	B
GSM5609289	B
GSM5609290	B
GSM5609291	B
GSM5609294	B
GSM5609295	B
GSM5609297	B
GSM5609301	B
GSM5609302	B
GSM5609305	B
GSM5609309	B
GSM5609311	B
GSM5609313	B
GSM5609314	B
GSM5609316	B
GSM5609318	B
GSM5609319	B
GSM5609321	B
GSM5609323	B
GSM5609325	B
GSM5609332	B
